# Supplementary material for: Japanese Clinical Practice Guidelines for Rehabilitation in Critically Ill Patients 2023 (J-ReCIP 2023)
Source: Springer Nature journal article supplement (doi:10.1186/s40560-023-00697-w), 2023-11-07
Supplement: MOESM1 [file 40560_2023_697_MOESM1_ESM.pdf]

## Additional file

**Disclosure of intellectual and financial conflicts of interest for each person who participated in the creation of this guideline.**

**Preparation role of each person who participated in the preparation of this guideline.**

### Committee Members and Directors in Charge

| Name               | Role of this Committee                                           | Areas of Responsibility |
|--------------------|------------------------------------------------------------------|-------------------------|
| Takeshi Unoki      | Committee Chair                                                  |                         |
| Shunsuke Taito     | Vice Chair<br>Member of Academic Guideline Promotion Group       | WG7 group leader, WG1   |
| Yusuke Kawai       | Vice Chair<br>Member of Academic Guideline Promotion Group       | WG2 group leader, WG8   |
| Kei Hayashida      | Committee Member<br>Head of Academic Guideline Promotion Group   |                         |
| Fumihito Kasai     | Committee Member                                                 | WG3 vice squad leader   |
| Hideaki Sakuramoto | Committee Member                                                 | WG8 group leader        |
| Kensuke Nakamura   | Committee Member                                                 | WG5 group leader        |
| Masakazu Saitoh    | Committee Member                                                 | WG4 group leader        |
| Morihide Ando      | Committee Member                                                 | WG1 vice squad leader   |
| Nobuyuki Sasaki    | Committee Member                                                 | WG1 vice squad leader   |
| Ryo Kozu           | Committee Member                                                 | WG1 group leader        |
| Ryuichi Saura      | Committee Member                                                 | WG1 vice squad leader   |
| Tatsuya Kawasaki   | Committee Member                                                 | WG6 group leader        |
| Yuki Iida          | Committee Member                                                 | WG3 group leader        |
| Yutaka Kondo       | Committee Member<br>Member of Academic Guideline Promotion Group | W2, W5                  |
| Tetsuya Takahashi  | Director in Charge                                               |                         |
| Osamu Nishida      | Advisor                                                          |                         |

### Academic Guideline Promotion Group

| Name              | Role of this Committee | Areas of Responsibility |
|-------------------|------------------------|-------------------------|
| Akira Ouchi       | Member                 | WG1, WG3                |
| Masatsugu Okamura | Member                 | WG4, WG8                |
| Norimasa Yamamoto | Member                 | WG1, WG5                |
| Saiko Okamoto     | Member                 |                         |
| Shodai Yoshihiro  | Member                 | WG2, WG7                |
| Tomoki Kuribara   | Member                 | WG4                     |
| Taisuke Yasaka    | Member                 | WG3, WG6                |
| Yujiro Matsuishi  | Member                 | WG6                     |

### Working Group Members, Systematic Review Members

| Name             | Role of this Committee                                                   | Areas of Responsibility |
|------------------|--------------------------------------------------------------------------|-------------------------|
| Akira Kuriyama   | Systematic Review Member<br>Member of Academic Guideline Promotion Group | WG3                     |
| Akiko Makino     | Working Group Member                                                     | WG8                     |
| Asuka Tsuchiya   | Working Group Member<br>Systematic Review Member                         | WG1                     |
| Chihiro Narita   | Working Group Member<br>Systematic Review Member                         | WG2                     |
| Chihiro Takayama | Working Group Member                                                     | WG4                     |
| Daisuke Okada    | Working Group Member<br>Systematic Review Member                         | WG1                     |
| Hiroshi Yonekura | Systematic Review Member                                                 | WG5                     |
| Hiroataka Masaki | Working Group Member<br>Systematic Review Member                         | WG1                     |
| Hiroyasu Inoue   | Systematic Review Member                                                 | WG3                     |
| Junko Tatsuno    | Working Group Member                                                     | WG5                     |

|                    |                                                  |        |
|--------------------|--------------------------------------------------|--------|
|                    | Systematic Review Member                         |        |
| Kazuki Okura       | Working Group Member<br>Systematic Review Member | WG2    |
| Keibun Liu         | Working Group Member<br>Systematic Review Member | WG5    |
| Kengo Obata        | Working Group Member                             | WG3    |
| Kohei Ota          | Working Group Member                             | WG8    |
| Kota Yamauchi      | Working Group Member<br>Systematic Review Member | WG7    |
| Kotaro Hirakawa    | Working Group Member                             | WG4    |
| Masahiro Takahashi | Working Group Member<br>Systematic Review Member | WG1    |
| Masanari Kuwabara  | Working Group Member                             | WG5    |
| Masaru Moromizato  | Working Group Member                             | WG7    |
| Masatoshi Hanada   | Working Group Member                             | WG4    |
| Mio Kitayama       | Working Group Member<br>Systematic Review Member | WG2    |
| Mitsuhiro Tamoto   | Working Group Member                             | WG4    |
| Naoki Kaneda       | Working Group Member<br>Systematic Review Member | WG6    |
| Naoki Sasanuma     | Working Group Member<br>Systematic Review Member | WG1    |
| Naonori Tashiro    | Working Group Member<br>Systematic Review Member | WG1    |
| Naoya Yanagi       | Working Group Member                             | WG4    |
| Natsuhiro Yamamoto | Working Group Member<br>Systematic Review Member | WG6    |
| Nobuto Nakanishi   | Systematic Review Member                         | WG5    |
| Ryo Abe            | Working Group Member                             | WG8    |
| Ryosuke Matsuki    | Working Group Member                             | WG4    |
| Ryuichi Kusaba     | Working Group Member<br>Systematic Review Member | WG6    |
| Saori Miyagishima  | Working Group Member<br>Systematic Review Member | WG2    |
| Satoshi Endo       | Working Group Member<br>Systematic Review Member | WG3, 7 |
| Shinichi Watanabe  | Systematic Review Member                         | WG3    |
| Shinya Matsushima  | Working Group Member<br>Systematic Review Member | WG5    |
| Shunsuke Kina      | Working Group Member                             | WG7    |
| Tadashi Nagato     | Working Group Member                             | WG5    |
| Tadayoshi Nonoyama | Working Group Member<br>Systematic Review Member | WG2    |
| Takahiko Tamura    | Working Group Member<br>Systematic Review Member | WG5    |
| Takahisa Otsuka    | Working Group Member<br>Systematic Review Member | WG6    |
| Takahito Iitsuka   | Working Group Member<br>Systematic Review Member | WG6    |
| Tomohiro Nawa      | Working Group Member<br>Systematic Review Member | WG6    |
| Wataru Matsuda     | Working Group Member<br>Systematic Review Member | WG3    |
| Yuhei Yamashita    | Working Group Member<br>Systematic Review Member | WG3    |
| Yuki Uchiyama      | Working Group Member                             | WG1    |
| Yuki Wakabayashi   | Working Group Member<br>Systematic Review Member | WG1    |
| Yukiko Katayama    | Working Group Member<br>Systematic Review Member | WG3    |

|                 |                                                  |     |
|-----------------|--------------------------------------------------|-----|
| Yusuke Tsutsumi | Working Group Member<br>Systematic Review Member | WG7 |
|-----------------|--------------------------------------------------|-----|

## The policy for disclosure of conflicts of interest (COI) in this clinical practice guideline

Financial conflicts of interest (COI) and intellectual COI are disclosed in this appendix file.

### COI type

This clinical practice guideline classifies COI into financial COI and intellectual (academic) COI and classifies them into Primary COI and Secondary COI based on their importance. Members with primary COI are not allowed to participate in discussions or voting on the recommendations, and secondary COI is only for disclosure (no restriction). Further, the following criteria for financial COI and intellectual COI are applied. Financial interest is payments received in exchange for services or any financial value derived from holdings. Intellectual interest is attachment to a certain academic ideas or activities that create the potential for cognitive biases, or attachment to a specific viewpoint.

| Category      | Financial COI                                                                                                                                   | Intellectual COI                                                                                                                           | Restriction                                                     |
|---------------|-------------------------------------------------------------------------------------------------------------------------------------------------|--------------------------------------------------------------------------------------------------------------------------------------------|-----------------------------------------------------------------|
| Primary COI   | Active relationship within 3 years met the following criteria<br>Committee chair<br>: Classification①<br>Committee members<br>: Classification② | Authorship of original studies, directly bearing on a recommendation<br>Peer-reviewed grant funding, directly bearing on a recommendation. | Restriction from all discussion and voting about recommendation |
| Secondary COI | Inactive relationship that meets the following criteria but have already expired (e.g., contracts have been terminated)                         | Other than the above                                                                                                                       | No restrictions                                                 |

### Financial COI

The following items are to be disclosed in accordance with criteria A, B and C below. Disclose retrospectively for the past three years from January 2019 to December 2021 (while those with voting rights extend from January 2020 to December 2022.).

Peer-reviewed grant funding from pharmaceutical manufacturers, etc. are also subject to COI. In cases where the person is in a position such as chief professor or department director, if the fund is obtained as for the entire department, they should be disclosed as COI (\*see item C below).

#### A. Declarant's own declaration

Regarding the COI declaration of an individual researcher, disclosure must be made for the following items A-1 to A-9.

##### A-1

When the compensation for a leadership position and/or an advisory role in one private company, corporate body, or for-profit organization (hereinafter referred to as "private company, corporate body, or organization") involved in medical research is one million yen or more per year.

##### A-2.

When the profit from stocks (total dividend and gain-on-sale) in one private company is one million yen or more per year, or when the ratio of stocks held is 5% or more of all shares in one private company.

##### A-3

When patent royalty and/or licensing fees for one patent and/or license from one private company, corporate body, or organization are one million yen or more per year.

##### A-4

When the daily allowance or honoraria (e.g. lecture fees) paid as compensation for the hours detained or labor for attending (or presenting at or providing advice at) meetings by one private company, corporate body, or organization is five hundred thousand yen or more per year.

##### A-5

When the total manuscript fee for writing brochures, articles on discussions, or other publications paid by one private company, corporate body, or organization is five hundred thousand yen or more per year.

A-6

When the total contract-based research funding (including funding for collaborative research, funded research, and drug trials) for medical research that the disclosing party may substantially make a decision on how to use paid by one private company, corporate body, or organization is one million yen or more per year.

A-7

When the total of contributions for scholarships provided by one private company, corporate body, or organization to a disclosing party, his/her course/class, or laboratory that the disclosing party may substantially make a decision on how to use is one million yen or more per year.

A-8

When a presenter belongs to a study group sponsored by a private company, corporate body, or organization; provided, however, that when the total contributions that the disclosing party may substantially make a decision on how to use is one million yen or more per year.

A-9

When the total amount paid by one private company, corporate body, or organization for travel, gifts or anything directly unrelated to research is fifty thousand yen or more per year.

**【B. Spouses, first-degree relatives, and anyone who shares the income and assets of the people】**

If spouses, first-degree relatives, and anyone who shares the income and assets of the people of a member met the following criteria, it should be indicated.

B-1

When the compensation for a leadership position and/or an advisory role in one private company, corporate body, or for-profit organization (hereinafter referred to as “private company, corporate body, or organization”) involved in medical research is one million yen or more per year.

B-2.

When the profit from stocks (total dividend and gain-on-sale) in one private company is one million yen or more per year, or when the ratio of stocks held is 5% or more of all shares in one private company.

B-3

When patent royalty and/or licensing fees for one patent and/or license from one private company, corporate body, or organization are one million yen or more per year.

**【C. Institutional COI】**

When the disclosing party is currently or was in the past in a relationship of joint researcher or co-researcher with the chief executive of the research institute to which the disclosing party belongs or the chief of the department of such institute (university, hospital, faculty, or center), the COI must be disclosed in accordance with the designated form (Form 3-C) for the following matters. Regarding the amounts that require COI disclosure, criteria have been set for each item requiring disclosure as follows:

C-1

When the total contract based research funding (including funding for collaborative research, funded research, and drug trials) for medical research that the disclosing party may substantially make a decision on how to use paid by one private company, corporate body, or organization is ten million yen or more per year.

C-2

When the total contributions provided by one private company, corporate body, or organization to a disclosing party, the affiliate institute or department to which the disclosing party belongs or chief of such institute or department for which the disclosing party may substantially make a decision on how to use is two million yen or more per year

C-3

When there are any shares owned by the research institute or department to which the disclosing party belongs or the head thereof (in a joint researcher or co-researcher relationship within the past three years), patent royalties, or investment in a venture company, include such as institutional COI.

## **Intellectual COI**

The following items are to be disclosed in accordance with criteria A, B and C below. The items in C-1 are treated as Primary COI. For items C-3 and C-4, if the research is based on acquired research funds, both the source of research funds and the name of the research should be disclosed and treated as a Primary COI.

### **A. Positions in academic organizations**

If a member has a position of board member in a national academic organizations or equivalents including societies in all areas within 3 years (between January 1, 2019 and December 2021 while those with voting rights extend from January 2020 to December 2022.), the position and society name should be listed.

### **B. Involvement in the clinical guidelines**

#### **B-1**

If a member has been involved in any medical guideline or its equivalent between January 2019, and December 2021 (while those with voting rights extend from January 2020 to December 2022), the name and position of the guideline should be indicated.

#### **B-2**

The member of a panel committee in the previous edition of the ARDS Clinical Practice Guidelines 2016, it should be indicated.

### **C. Involvement in related research**

#### **C-1**

If a member is an author (co-author) of a paper that is included as primary original study in a systematic review for developing recommendation, the name of the paper and journal should be indicated. (It includes the period before the last three years.)

#### **C-2**

If a member is an author (or coauthor) of systematic review for developing recommendation, the name of the paper and the journal should be disclosed. (It includes the period before the last three years.)

#### **C-3**

If a member is an author of the study or speaker (including co-author or co-speaker) in a conference presentation related to clinical question in this guideline published or held between January 2019 and December 2021(while those with voting rights extend from January 2020 to December 2022), the name of the article, journal or conference should be indicated.

#### **C-4**

If a member is involved in the research related to the clinical questions in this guideline performed between January 2019 and December 2021(while those with voting rights extend from January 2020 to December 2022), the name of the research should be disclosed.

## COI List (Financial COI)

| Name               | A-1 | A-2 | A-3 | A-4 | A-5 | A-6 | A-7 | A-8 | A-9 | B-1 | B-2 | B-3 | C-1 | C-2 | C-3 |
|--------------------|-----|-----|-----|-----|-----|-----|-----|-----|-----|-----|-----|-----|-----|-----|-----|
| Takeshi Unoki      | NA  | NA  | NA  | NA  | NA  | NA  | NA  | NA  | NA  | NA  | NA  | NA  | NA  | NA  | NA  |
| Shunsuke Taito     | NA  | NA  | NA  | NA  | NA  | NA  | NA  | NA  | NA  | NA  | NA  | NA  | NA  | NA  | NA  |
| Yusuke Kawai       | NA  | NA  | NA  | NA  | NA  | NA  | NA  | NA  | NA  | NA  | NA  | NA  | NA  | NA  | NA  |
| Kei Hayashida      | NA  | NA  | NA  | NA  | NA  | NA  | NA  | NA  | NA  | NA  | NA  | NA  | *1  | NA  | NA  |
| Fumihito Kasai     | NA  | NA  | NA  | NA  | NA  | NA  | NA  | NA  | NA  | NA  | NA  | NA  | NA  | NA  | NA  |
| Hideaki Sakuramoto | NA  | NA  | NA  | NA  | NA  | NA  | NA  | *2  | NA  | NA  | NA  | NA  | NA  | NA  | NA  |
| Kensuke Nakamura   | NA  | NA  | NA  | NA  | NA  | NA  | NA  | NA  | NA  | NA  | NA  | NA  | NA  | NA  | NA  |
| Masakazu Saitoh    | NA  | NA  | NA  | NA  | NA  | NA  | NA  | NA  | NA  | NA  | NA  | NA  | NA  | NA  | NA  |
| Morihide Ando      | NA  | NA  | NA  | NA  | NA  | NA  | NA  | NA  | NA  | NA  | NA  | NA  | NA  | NA  | NA  |
| Nobuyuki Sasaki    | NA  | NA  | NA  | *3  | NA  | NA  | NA  | NA  | NA  | NA  | NA  | NA  | NA  | NA  | NA  |
| Ryo Kozu           | NA  | NA  | NA  | *4  | NA  | NA  | *5  | NA  | NA  | NA  | NA  | NA  | NA  | NA  | NA  |
| Ryuichi Saura      | NA  | NA  | NA  | NA  | NA  | NA  | NA  | NA  | NA  | NA  | NA  | NA  | NA  | NA  | NA  |
| Tatsuya Kawasaki   | NA  | NA  | NA  | NA  | NA  | NA  | NA  | NA  | NA  | NA  | NA  | NA  | NA  | NA  | NA  |
| Yuki Iida          | NA  | NA  | NA  | NA  | NA  | NA  | NA  | NA  | NA  | NA  | NA  | NA  | NA  | NA  | NA  |
| Yutaka Kondo       | NA  | NA  | NA  | NA  | NA  | NA  | NA  | *6  | NA  | NA  | NA  | NA  | NA  | NA  | NA  |
| Tetsuya Takahashi  | NA  | NA  | NA  | NA  | NA  | NA  | NA  | *7  | NA  | NA  | NA  | NA  | *8  | NA  | NA  |
| Osamu Nishida      | NA  | NA  | NA  | NA  | NA  | *9  | *10 | NA  | NA  | NA  | NA  | NA  | NA  | NA  | NA  |
|                    |     |     |     |     |     |     |     |     |     |     |     |     |     |     |     |
| Akira Ouchi        | NA  | NA  | NA  | NA  | NA  | NA  | NA  | NA  | NA  | NA  | NA  | NA  | NA  | NA  | NA  |
| Masatsugu Okamura  | NA  | NA  | NA  | NA  | NA  | NA  | NA  | NA  | NA  | NA  | NA  | NA  | NA  | NA  | NA  |
| Norimasa Yamamoto  | NA  | NA  | NA  | NA  | NA  | NA  | NA  | NA  | NA  | NA  | NA  | NA  | NA  | NA  | NA  |
| Saiko Okamoto      | NA  | NA  | NA  | NA  | NA  | NA  | NA  | NA  | NA  | NA  | NA  | NA  | NA  | NA  | NA  |
| Shodai Yoshihiro   | NA  | NA  | NA  | NA  | NA  | NA  | NA  | NA  | NA  | NA  | NA  | NA  | NA  | NA  | NA  |
| Tomoki Kuribara    | NA  | NA  | NA  | NA  | NA  | NA  | NA  | NA  | NA  | NA  | NA  | NA  | NA  | NA  | NA  |
| Taisuke Yasaka     | NA  | NA  | NA  | NA  | NA  | NA  | NA  | NA  | NA  | NA  | NA  | NA  | NA  | NA  | NA  |
| Yujiro Matsuishi   | NA  | NA  | NA  | NA  | NA  | NA  | NA  | NA  | NA  | NA  | NA  | NA  | NA  | NA  | NA  |
|                    |     |     |     |     |     |     |     |     |     |     |     |     |     |     |     |
| Akiko Makino       | NA  | NA  | NA  | NA  | NA  | NA  | NA  | NA  | NA  | NA  | NA  | NA  | NA  | NA  | NA  |
| Akira Kuriyama     | NA  | NA  | NA  | NA  | NA  | NA  | NA  | NA  | NA  | NA  | NA  | NA  | NA  | NA  | NA  |
| Asuka Tsuchiya     | NA  | NA  | NA  | NA  | NA  | NA  | NA  | NA  | NA  | NA  | NA  | NA  | NA  | NA  | NA  |
| Chihiro Narita     | NA  | NA  | NA  | NA  | NA  | NA  | NA  | NA  | NA  | NA  | NA  | NA  | NA  | NA  | NA  |
| Chihiro Takayama   | NA  | NA  | NA  | NA  | NA  | NA  | NA  | NA  | NA  | NA  | NA  | NA  | NA  | NA  | NA  |
| Daisuke Okada      | NA  | NA  | NA  | NA  | NA  | NA  | NA  | NA  | NA  | NA  | NA  | NA  | NA  | NA  | NA  |
| Hiroshi Yonekura   | NA  | NA  | NA  | NA  | NA  | NA  | NA  | NA  | NA  | NA  | NA  | NA  | NA  | NA  | NA  |
| Hiroataka Masaki   | NA  | NA  | NA  | NA  | NA  | NA  | NA  | NA  | NA  | NA  | NA  | NA  | NA  | NA  | NA  |
| Hiroyasu, Inoue    | NA  | NA  | NA  | NA  | NA  | NA  | NA  | NA  | NA  | NA  | NA  | NA  | NA  | NA  | NA  |
| Junko Tatsuno      | NA  | NA  | NA  | NA  | NA  | NA  | NA  | NA  | NA  | NA  | NA  | NA  | NA  | NA  | NA  |

|                    |     |    |    |    |    |    |     |    |    |    |    |    |    |    |    |
|--------------------|-----|----|----|----|----|----|-----|----|----|----|----|----|----|----|----|
| Kazuki Okura       | NA  | NA | NA | NA | NA | NA | NA  | NA | NA | NA | NA | NA | NA | NA | NA |
| Keibun Liu         | *11 | NA | NA | NA | NA | NA | NA  | NA | NA | NA | NA | NA | NA | NA | NA |
| Kengo Obata        | NA  | NA | NA | NA | NA | NA | NA  | NA | NA | NA | NA | NA | NA | NA | NA |
| Kohei Ota          | NA  | NA | NA | NA | NA | NA | *12 | NA | NA | NA | NA | NA | NA | NA | NA |
| Kota Yamauchi      | NA  | NA | NA | NA | NA | NA | NA  | NA | NA | NA | NA | NA | NA | NA | NA |
| Kotaro Hirakawa    | NA  | NA | NA | NA | NA | NA | NA  | NA | NA | NA | NA | NA | NA | NA | NA |
| Masahiro Takahashi | NA  | NA | NA | NA | NA | NA | NA  | NA | NA | NA | NA | NA | NA | NA | NA |
| Masanari Kuwabara  | NA  | NA | NA | NA | NA | NA | NA  | NA | NA | NA | NA | NA | NA | NA | NA |
| Masaru Moromizato  | NA  | NA | NA | NA | NA | NA | NA  | NA | NA | NA | NA | NA | NA | NA | NA |
| Masatoshi Hanada   | NA  | NA | NA | NA | NA | NA | NA  | NA | NA | NA | NA | NA | NA | NA | NA |
| Mio Kitayama       | NA  | NA | NA | NA | NA | NA | NA  | NA | NA | NA | NA | NA | NA | NA | NA |
| Mitsuhiro Tamoto   | NA  | NA | NA | NA | NA | NA | NA  | NA | NA | NA | NA | NA | NA | NA | NA |
| Naoki Kaneda       | NA  | NA | NA | NA | NA | NA | NA  | NA | NA | NA | NA | NA | NA | NA | NA |
| Naoki Sasanuma     | NA  | NA | NA | NA | NA | NA | NA  | NA | NA | NA | NA | NA | NA | NA | NA |
| Naonori Tashiro    | NA  | NA | NA | NA | NA | NA | NA  | NA | NA | NA | NA | NA | NA | NA | NA |
| Naoya Yanagi       | NA  | NA | NA | NA | NA | NA | NA  | NA | NA | NA | NA | NA | NA | NA | NA |
| Natsuhiko Yamamoto | NA  | NA | NA | NA | NA | NA | NA  | NA | NA | NA | NA | NA | NA | NA | NA |
| Nobuto Nakanishi   | NA  | NA | NA | NA | NA | NA | NA  | NA | NA | NA | NA | NA | NA | NA | NA |
| Ryosuke Matsuki    | NA  | NA | NA | NA | NA | NA | NA  | NA | NA | NA | NA | NA | NA | NA | NA |
| Ryo Abe            | NA  | NA | NA | NA | NA | NA | NA  | NA | NA | NA | NA | NA | NA | NA | NA |
| Ryuichi Kusaba     | NA  | NA | NA | NA | NA | NA | NA  | NA | NA | NA | NA | NA | NA | NA | NA |
| Saori Miyagishima  | NA  | NA | NA | NA | NA | NA | NA  | NA | NA | NA | NA | NA | NA | NA | NA |
| Satoshi Endo       | NA  | NA | NA | NA | NA | NA | NA  | NA | NA | NA | NA | NA | NA | NA | NA |
| Shinichi Watanabe  | NA  | NA | NA | NA | NA | NA | NA  | NA | NA | NA | NA | NA | NA | NA | NA |
| Shinya Matsushima  | NA  | NA | NA | NA | NA | NA | NA  | NA | NA | NA | NA | NA | NA | NA | NA |
| Shunsuke Kina      | NA  | NA | NA | NA | NA | NA | NA  | NA | NA | NA | NA | NA | NA | NA | NA |
| Tadashi Nagato     | NA  | NA | NA | NA | NA | NA | NA  | NA | NA | NA | NA | NA | NA | NA | NA |
| Tadayoshi Nonoyama | NA  | NA | NA | NA | NA | NA | NA  | NA | NA | NA | NA | NA | NA | NA | NA |
| Takahiko Tamura    | NA  | NA | NA | NA | NA | NA | NA  | NA | NA | NA | NA | NA | NA | NA | NA |
| Takahisa Otsuka    | NA  | NA | NA | NA | NA | NA | NA  | NA | NA | NA | NA | NA | NA | NA | NA |
| Takahito Iitsuka   | NA  | NA | NA | NA | NA | NA | NA  | NA | NA | NA | NA | NA | NA | NA | NA |
| Tomohiro Nawa      | NA  | NA | NA | NA | NA | NA | NA  | NA | NA | NA | NA | NA | NA | NA | NA |
| Wataru Matsuda     | NA  | NA | NA | NA | NA | NA | NA  | NA | NA | NA | NA | NA | NA | NA | NA |
| Yuhei Yamashita    | NA  | NA | NA | NA | NA | NA | NA  | NA | NA | NA | NA | NA | NA | NA | NA |
| Yuki Uchiyama      | NA  | NA | NA | NA | NA | NA | NA  | NA | NA | NA | NA | NA | NA | NA | NA |
| Yuki Wakabayashi   | NA  | NA | NA | NA | NA | NA | NA  | NA | NA | NA | NA | NA | NA | NA | NA |
| Yukiko Katayama    | NA  | NA | NA | NA | NA | NA | NA  | NA | NA | NA | NA | NA | NA | NA | NA |
| Yusuke Tsutsumi    | NA  | NA | NA | NA | NA | NA | NA  | NA | NA | NA | NA | NA | NA | NA | NA |

NA: Not applicable



- \* 1 TAIYOU NIPPON SANZO, 2021
- \* 2 New nursing Corporation, Endowed chair, 2022
- \* 3 Teijin Pharma, 2021, 2022
- \* 4 Teijin, 2019  
Boehringer Ingelheim, 2022
- \* 5 Philips Japan, 2021
- \* 6 TOPPAN, 2021
- \* 7 Philips Japan, Toho Holdings, Inter Reha, Asahi KASEI  
Department of Digital Medicine Juntendo University
- \* 8 Philips Japan, Collaborating research, 2022  
Toho Holdings, Collaborating research, 2022  
Kyocera ・ FUKUDA ・ Inter Reha ・ AMI, Collaborating research  
MF Consulting, Collaborating research
- \* 9 Maruishi Pharmaceutical, Clinical trial, 2019,2020,2021  
ONO PHARMACEUTICAL, Clinical trial, 2019  
Fortrea Japan (Labcorp Drug Development Japan), Clinical trial, 2021  
Healio, Clinical trial, 2021
- \* 10 Baxter, 2019  
SHIONOGI, 2019, 2020  
ONO Pharmaceutical, 2019  
Asahi KASEI, 2020  
Asahi KASEI Pharma, 2021, 2022
- \* 11 Senko Medical Instrument, Consultant, 2020
- \* 12 HIROSHIMA ROTARY CLUB, 2022

## COI List (Intellectual COI) (Items without names in English are listed in Japanese. )

| Name               | A : Society, Role                                                                                                                                                                                                                                                                                                                                                                                                                                             | B-1 : Guideline, Role                                                                                                     | B-2: Member of previous version | C-1: Title, Journal | C-2: Title, Journal, C-3: Title, Conference | C-4: Related research |
|--------------------|---------------------------------------------------------------------------------------------------------------------------------------------------------------------------------------------------------------------------------------------------------------------------------------------------------------------------------------------------------------------------------------------------------------------------------------------------------------|---------------------------------------------------------------------------------------------------------------------------|---------------------------------|---------------------|---------------------------------------------|-----------------------|
| Takeshi Unoki      | The Japanese Society of Intensive Care Medicine, Director                                                                                                                                                                                                                                                                                                                                                                                                     | J-SSCG2020, WG member                                                                                                     | A                               | NA                  | * 18                                        | NA                    |
| Shunsuke Taito     | NA                                                                                                                                                                                                                                                                                                                                                                                                                                                            | J-SSCG2020, AC member/理学療法ガイドライン第2, SR member/ARDS clinical practice guideline 2021, 領域責任委員/ J-SSCG2024, Committee Member | NA                              | NA                  | * 2                                         | NA                    |
| Yusuke Kawai       | Japanese Society for Early Mobilization, director                                                                                                                                                                                                                                                                                                                                                                                                             | J-SSCG2020, AC member WG member SR member/J-SSCG2024, Committee Member /気管吸引ガイドライン 2023(改訂第3版), Committee Member          | NA                              | NA                  | NA                                          | * 7, 15               |
| Kei Hayashida      | NA                                                                                                                                                                                                                                                                                                                                                                                                                                                            | J-SSCG2020, AC member/Japanese Resuscitation Council Resuscitation Care Guidelines 2020, WG member                        | NA                              | NA                  | NA                                          | NA                    |
| Fumihito Kasai     | NA                                                                                                                                                                                                                                                                                                                                                                                                                                                            | NA                                                                                                                        | NA                              | NA                  | * 3, 4                                      | * 16                  |
| Hideaki Sakuramoto | NA                                                                                                                                                                                                                                                                                                                                                                                                                                                            | J-SSCG2020, WG member                                                                                                     | Y                               | NA                  | NA                                          | NA                    |
| Kensuke Nakamura   | Japanese Society for Early Mobilization, director<br>Japan Society for Homecare and Emergency Medicine, director<br>Japanese Association for Acute Medicine, director                                                                                                                                                                                                                                                                                         | J-SSCG2020, WG member/重症患者の栄養療法ガイドライン 2024, Vice Chair                                                                    | NA                              | * 1                 | * 1, 18                                     | * 1                   |
| Masakazu Saitoh    | Japanese Society of Renal Rehabilitation, director                                                                                                                                                                                                                                                                                                                                                                                                            | 呼吸療法ガイドライン第2版 SR member/心血管理学療法ガイドライン, SR member                                                                          | Y                               | NA                  | NA                                          | NA                    |
| Morihide Ando      | Japanese Society for Respiratory Care and Rehabilitation, director                                                                                                                                                                                                                                                                                                                                                                                            | COPD 診断と治療のためのガイドライン 2022, SR Committee Member                                                                            | Y                               | NA                  | NA                                          | NA                    |
| Nobuyuki Sasaki    | Japanese Association of Rehabilitation Medicine 事務局, executive director<br>The Japanese Society of Acute Rehabilitation Medicine, auditor                                                                                                                                                                                                                                                                                                                     | Japan Stroke Society guideline 2021, Committee Member                                                                     | NA                              | NA                  | NA                                          | NA                    |
| Ryo Kozu           | The Japanese Society for Respiratory Care and Rehabilitation, director<br>Japanese Society for Respiratory Care Medicine 職種指定理事<br>Japanese Society of Physical Respiratory Therapy, director                                                                                                                                                                                                                                                                 | ARDS clinical practice guideline 2021, パネル会議メンバー/理学療法ガイドライン第2版, Committee Member                                          | Y                               | NA                  | * 5                                         | NA                    |
| Ryuichi Saura      | Japanese Association of Rehabilitation Medicine, director<br>The Japanese Society of Acute Rehabilitation Medicine, director<br>The Japanese Organization for Education and Certification of Rehabilitation Medicine, director<br>Japan Stroke Association, director<br>Japan disaster Rehabilitation Assistance Team 副代表<br>Duskin AINOWA Foundation, board member<br>Japanese Association for Rheumatism Rehabilitation 代表世話人<br>日本がんリハビリテーション研究会, director | Guidelines for Cancer Rehabilitation (第2版), Committee Member/マディカルスタッフのためのライフステージに応じた関節リウマチ患者支援ガイド, Research member       | NA                              | NA                  | NA                                          | NA                    |

|                   |                                                                                                                                                                                                                                                                                                                                                           |                                                                                                                                                                                                                                                                                                                                                                                                                                                                                                                                                                                                                                                                                                                               |    |    |      |    |
|-------------------|-----------------------------------------------------------------------------------------------------------------------------------------------------------------------------------------------------------------------------------------------------------------------------------------------------------------------------------------------------------|-------------------------------------------------------------------------------------------------------------------------------------------------------------------------------------------------------------------------------------------------------------------------------------------------------------------------------------------------------------------------------------------------------------------------------------------------------------------------------------------------------------------------------------------------------------------------------------------------------------------------------------------------------------------------------------------------------------------------------|----|----|------|----|
| Tatsuya Kawasaki  | NA                                                                                                                                                                                                                                                                                                                                                        | J-SSCG2020, Committee Member/ J-SSCG2024, Committee Member / ARDS clinical practice guideline 2021, Pediatric Panel Members/Japanese Resuscitation Council Resuscitation Care Guidelines 2020, 作業部会メンバー/Japanese rapid/living recommendations on drug management for COVID-19, Advisory board member/COVID-19 関連多系統炎症性症候群 (MIS-C/PIMS) 診療コンセンサスステートメント, WG member/日本小児科学会予防接種・感染症対策委員会および日本集中治療医学会小児集中治療委員会日本小児集中治療連絡協議会 COVID-19 ワーキンググループ 活動報告第2報, WG member                                                                                                                                                                                                                                                                | NA | NA | NA   | NA |
| Yuki Iida         | Japanese Society of Cardiovascular Physical Therapy, director<br>The Japanese Society for Respiratory Care and Rehabilitation, director                                                                                                                                                                                                                   | J-SSCG2020, WG member                                                                                                                                                                                                                                                                                                                                                                                                                                                                                                                                                                                                                                                                                                         | Y  | NA | NA   | NA |
| Yutaka Kondo      | NA                                                                                                                                                                                                                                                                                                                                                        | J-SSCG2020, WG member/ J-SSCG2024, Committee Member/ARDS clinical practice guideline 202, 統括本部委員/Japanese Resuscitation Council Resuscitation Care Guidelines 2020, Committee Member/JCS 2022 Guideline Perioperative Cardiovascular Assessment and Management for Non-cardiac Surgery, 協力委員/熱中症診療ガイドライン2024, 副編集長                                                                                                                                                                                                                                                                                                                                                                                                            | NA | NA | * 18 | NA |
| Tetsuya Takahashi | Japanese Association of Cardiac Rehabilitation, vice director<br>Japanese Society of Cardiovascular Physical Therapy, vice director<br>Japanese Physical Association, vice director                                                                                                                                                                       | JCS/JACR 2021 Guideline on Rehabilitation in Patients with Cardiovascular Disease, 班員/理学療法ガイドライン第2版, 循環器班・副班長                                                                                                                                                                                                                                                                                                                                                                                                                                                                                                                                                                                                                 | Y  | NA | NA   | NA |
| Osamu Nishida     | The Japanese Society of Intensive Care Medicine, President<br>Japanese Society of Blood Purification in Critical Care, President<br>Japanese Society of Respiratory Care Medicine, director<br>The Japan Shock Society, director<br>The Japanese Society for Therapeutics and Engineering, director<br>Japanese Society for Clinical Monitoring, director | J-SSCG2020, Director in Charge/ Japanese guidelines for the management of Pain, Agitation, and Delirium in intensive care unit (J-PAD), Director in Charge/集中治療を要する重症患者の広域搬送ガイドライン, President/遠隔ICU 設置と運用に関するガイドライン改訂版 2023 年 5 月, President/ 日本集中治療医学会集中治療に係るタスク・シフト/フェアに関する安全管理指針, President/臓器提供を見据えた患者評価・管理と術中管理のためのマニュアル (厚生労働科学特別研究事業), Research member/ Japanese rapid/living recommendations on drug management for COVID-19, director in charge/ARDS clinical practice guideline 2021, President/集中治療部設置のための指針2022年改訂版, President/集中治療部設置のための指針2021 年改訂について 空調設備に関する改訂方針と提言, president/ 日本集中治療医学会 集中治療室における安全管理指針, President/新型コロナウイルス感染症流行に際しての医療資源配分の観点から治療の差し控え・中止についての提言, President/集中治療室における薬剤師の活動方針, President | Y  | NA | NA   | NA |
| Akira Kuriyama    | NA                                                                                                                                                                                                                                                                                                                                                        | NA                                                                                                                                                                                                                                                                                                                                                                                                                                                                                                                                                                                                                                                                                                                            | NA | NA | NA   | NA |
| Akira Ouchi       | NA                                                                                                                                                                                                                                                                                                                                                        | J-SSCG2020, WG member                                                                                                                                                                                                                                                                                                                                                                                                                                                                                                                                                                                                                                                                                                         | NA | NA | NA   | NA |
| Masatsugu Okamura | NA                                                                                                                                                                                                                                                                                                                                                        | NA                                                                                                                                                                                                                                                                                                                                                                                                                                                                                                                                                                                                                                                                                                                            | NA | NA | NA   | NA |

|                    |    |                                                                                                                                                      |    |    |      |      |
|--------------------|----|------------------------------------------------------------------------------------------------------------------------------------------------------|----|----|------|------|
| Norimasa Yamamoto  | NA | NA                                                                                                                                                   | NA | NA | * 18 | NA   |
| Saiko Okamoto      | NA | NA                                                                                                                                                   | NA | NA | NA   | NA   |
| Shodai Yoshihiro   | NA | J-SSCG2020, WG member/ARDS clinical practice guideline 2021, SR member                                                                               | NA | NA | NA   | NA   |
| Tomoki Kuribara    | NA | NA                                                                                                                                                   | NA | NA | NA   | NA   |
| Taisuke Yasaka     | NA | NA                                                                                                                                                   | NA | NA | * 6  | NA   |
| Yujiro Matsuishi   | NA | NA                                                                                                                                                   | NA | NA | NA   | NA   |
|                    |    |                                                                                                                                                      |    |    |      |      |
| Akiko Makino       | NA | NA                                                                                                                                                   | NA | NA | NA   | NA   |
| Akira Kuriyama     | NA | NA                                                                                                                                                   | NA | NA | NA   | NA   |
| Asuka Tsuchiya     | NA | J-SSCG2020 WG member, SR member/急性肺炎診療ガイドライン 2021, Committee Member/血管塞栓術に用いるゼラチンスポンジガイドライン, Committee Member                                        | NA | NA | NA   | NA   |
| Chihiro Narita     | NA | J-SSCG2020, SR member/ARDS clinical practice guideline 2021, サポート班/領域責任委員 SR 責任者/J-SSCG2020 COVID-19living guideline, WG メンバー/ J-SSCG2024, AC member | NA | NA | NA   | NA   |
| Chihiro Takayama   | NA | NA                                                                                                                                                   | NA | NA | NA   | NA   |
| Daisuke Okada      | NA | 理学療法ガイドライン第2版, SR member                                                                                                                             | NA | NA | NA   | NA   |
| Hiroshi Yonekura   | NA | J-SSCG2020, WG member/ARDS clinical practice guideline 2021, Committee Member/周術期禁煙ガイドライン改定                                                          | NA | NA | * 18 | NA   |
| Hirotsuka Masaki   | NA | NA                                                                                                                                                   | NA | NA | NA   | NA   |
| Hiroyasu Inoue     | NA | 理学療法ガイドライン第2版, SR member                                                                                                                             | NA | NA | * 8  | * 17 |
| Junko Tatsuno      | NA | NA                                                                                                                                                   | NA | NA | * 18 | NA   |
| Kazuki Okura       | NA | 理学療法ガイドライン第2版, SR member                                                                                                                             | NA | NA | NA   | NA   |
| Keibun Liu         | NA | NA                                                                                                                                                   | NA | NA | * 7  | NA   |
| Kengo Obata        | NA | NA                                                                                                                                                   | NA | NA | NA   | NA   |
| Kohei Ota          | NA | J-SSCG2020, WG member/ARDS clinical practice guideline 2021, SR member                                                                               | NA | NA | NA   | NA   |
| Kota Yamauchi      | NA | 日本理学療法士協会・理学療法ガイドライン, SR member/ARDS clinical practice guideline 2021, SR member                                                                     | NA | NA | NA   | NA   |
| Kotaro Hirakawa    | NA | NA                                                                                                                                                   | NA | NA | NA   | NA   |
| Masahiro Takahashi | NA | 理学療法ガイドライン第2版, SR member                                                                                                                             | Y  | NA | NA   | NA   |
| Masanari Kuwabara  | NA | 新型コロナウイルス感染症診療の手引き別冊 執筆協力者/循環器病対策推進基本計画 厚生労働省(事務局)                                                                                                   | NA | NA | NA   | NA   |
| Masaru Moromizato  | NA | NA                                                                                                                                                   | NA | NA | NA   | NA   |

|                    |    |                                                                                                                                                      |    |    |          |      |
|--------------------|----|------------------------------------------------------------------------------------------------------------------------------------------------------|----|----|----------|------|
| Masatoshi Hanada   | NA | 理学療法ガイドライン 第2班 COPD 班, 副班長                                                                                                                           | NA | NA | NA       | NA   |
| Mio Kitayama       | NA | NA                                                                                                                                                   | NA | NA | NA       | NA   |
| Mitsuhiro Tamoto   | NA | NA                                                                                                                                                   | NA | NA | NA       | NA   |
| Naoki Kaneda       | NA | 理学療法ガイドライン第2版, SR member                                                                                                                             | NA | NA | NA       | NA   |
| Naoki Sasanuma     | NA | 理学療法ガイドライン第2版, SR member                                                                                                                             | Y  | NA | NA       | NA   |
| Naonori Tashiro    | NA | NA                                                                                                                                                   | Y  | NA | * 9      | NA   |
| Naoya Yanagi       | NA | NA                                                                                                                                                   | NA | NA | NA       | NA   |
| Natsuhiko Yamamoto | NA | NA                                                                                                                                                   | NA | NA | NA       | NA   |
| Nobuto Nakanishi   | NA | NA                                                                                                                                                   | NA | NA | * 10, 18 | * 10 |
| Ryo Abe            | NA | 理学療法ガイドライン第2版, SR member                                                                                                                             | NA | NA | NA       | NA   |
| Ryosuke Matsuki    | 有  | 理学療法ガイドライン (第2版), SR member                                                                                                                          | NA | NA | * 11     | NA   |
| Ryuichi Kusaba     | NA | NA                                                                                                                                                   | NA | NA | NA       | NA   |
| Saori Miyagishima  | NA | NA                                                                                                                                                   | NA | NA | NA       | NA   |
| Satoshi Endo       | NA | ICU における COVID-19 患者に対するリハビリテーション Q&A, WG member                                                                                                     | NA | NA | NA       | NA   |
| Shinichi Watanabe  | NA | NA                                                                                                                                                   | NA | NA | NA       | NA   |
| Shinya Matsushima  | 有  | 理学療法ガイドライン (第2版), SR member                                                                                                                          | NA | NA | * 12, 18 | NA   |
| Shunsuke Kina      | NA | NA                                                                                                                                                   | NA | NA | NA       | NA   |
| Tadashi Nagato     | NA | J-SSCG2020, SR member/ARDS clinical practice guideline 2021, SR member /結核診療ガイドライン, SR member/Japan Stroke Society guideline 2021, task force member | NA | NA | NA       | NA   |
| Tadayoshi Nonoyama | NA | NA                                                                                                                                                   | NA | NA | NA       | NA   |
| Takahiko Tamura    | NA | NA                                                                                                                                                   | NA | NA | * 13, 18 | NA   |
| Takahisa Otsuka    | NA | NA                                                                                                                                                   | NA | NA | NA       | NA   |
| Takahito Iitsuka   | NA | 理学療法ガイドライン第2版, SR member                                                                                                                             | NA | NA | * 14     | NA   |
| Tomohiro Nawa      | NA | NA                                                                                                                                                   | NA | NA | NA       | NA   |
| Wataru Matsuda     | NA | NA                                                                                                                                                   | NA | NA | NA       | NA   |
| Yuhei Yamashita    | NA | NA                                                                                                                                                   | NA | NA | NA       | NA   |
| Yuki Uchiyama      | NA | NA                                                                                                                                                   | NA | NA | NA       | NA   |

|                  |    |                       |    |    |    |    |
|------------------|----|-----------------------|----|----|----|----|
| Yuki Wakabayashi | NA | NA                    | NA | NA | NA | NA |
| Yukiko Katayama  | NA | NA                    | NA | NA | NA | NA |
| Yusuke Tsutsumi  | NA | J-SSCG2020, WG member | NA | NA | NA | NA |

(Abbreviation)

J-SSCG2020: Japanese Surviving Sepsis Clinical Guideline 2020, NA: Not applicable, SR: Systematic review, WG: Working group

**C-1**

\* 1

Nakamura K, Kihata A, Naraba H, et al. Efficacy of belt electrode skeletal muscle electrical stimulation on reducing the rate of muscle volume loss in critically ill patients: A randomized controlled trial *J Rehabil Med*. 2019;51(9):705-711.

Nakamura K, Nakano H, Naraba H, et al. High protein versus medium protein delivery under equal total energy delivery in critical care: A randomized controlled trial. *Clin Nutr*. 2021;40(3):796-803.

Nakamura K, Kihata A, Naraba H, et al.  $\beta$ -Hydroxy- $\beta$ -methylbutyrate, Arginine, and Glutamine Complex on Muscle Volume Loss in Critically Ill Patients: A Randomized Control Trial. *JPEN J Parenter Enteral Nutr*. 2020;44(2):205-212.

**C-2 C-3**

\* 2

Taito S, Yamauchi K, Tsujimoto Y, Banno M, Tsujimoto H, Kataoka Y. Does enhanced physical rehabilitation following intensive care unit discharge improve outcomes in patients who received mechanical ventilation? A systematic review and meta-analysis. *BMJ Open*. 2019;9(6):e026075.

\* 3

The Japanese Situation of Swallowing Evaluation & Treatment, 2th World Dysphagia, 2021

\* 4

本邦の集中治療室における摂食嚥下診療調査, 日本摂食嚥下リハビリテーション学会雑誌, 2022

\* 5

ICUにおける早期リハビリテーションの取り組み: 理学療法士の立場から ICU 多職種合同シンポジウム「ICUにおける早期リハビリテーションを考える」 第4回日本集中治療医学会九州支部学術集会, 2020

Watanabe S, Kotani T, Taito S, et al. Determinants of gait independence after mechanical ventilation in the intensive care unit: a Japanese multicenter retrospective exploratory cohort study. *J Intensive Care*. 2019;7:53.

\* 6

集中治療室における早期リハビリテーション実践の実態: 横断調査, 日本クリティカルケア看護学会学術集会, 2020.

本邦集中治療室における重症患者に対するリハビリテーション実践と患者及び組織特性の関連の検討: 横断研究, 日本集中治療医学会, 2021.

ICUに入室する急性呼吸不全患者に対する早期離床: 最新の知見に基づき臨床実践の課題を考える, 日本集中治療医学会, 2022.

\* 7

集中治療室重症患者の予後に関する調査, 2021

\* 8

携帯型超音波機器を用いた嚥下機能評価と多職種連携による経口摂取を再開できた1例, 日本リハビリテーション看護学会, 2021

携帯型超音波機器によるベッドサイド嚥下評価の試み 梨状窩通過時の嚥下物検出の信頼性の検証, 日本摂食・嚥下リハビリテーション学会, 2021

48時間以上の経口挿管下人工呼吸管理患者における抜管後誤嚥性肺炎発症の予測因子の検証, 昭和学会雑誌, 2019

\* 9

48時間以上の人工呼吸装着患者の退院時自立補講の関連因子, 日本集中治療医学会雑誌, 2021

48時間以上経口挿管下人工呼吸管理患者における抜管後誤嚥性肺炎発症の予測因子の検証, 昭和学会誌, 2019

\* 10

Nakanishi N, Oto J, Tsutsumi R, et al. Effect of Electrical Muscle Stimulation on Upper and Lower Limb Muscles in Critically Ill Patients: A Two-Center Randomized Controlled Trial. *Crit Care Med*. 2020;48(11):e997-e1003.

\* 11

Matsuki R, Kojima N, Watanabe K, et al. Impact of a Rehabilitation Protocol and a Dedicated Therapist in the Intensive Care Unit on Physical Function and Activities of Daily Living. *Prog Rehabil Med*. 2020;5:20200027.

\* 12

Matsushima S, Yoshida M, Yokoyama H, et al. Effects on physical performance of high protein intake for

critically ill adult patients admitted to the intensive care unit: A retrospective propensity-matched analysis. *Nutrition*. 2021;91-92:111407.

ICU 入室 7 日目の蛋白投与量は転帰時の ADL に影響を与えるか？ 集中治療医学会, 2020

集中治療領域における NST ガイドライン検証 重症患者における急性期にエネルギー投与量が ADL の転帰に与える影響 単施設後ろ向きコホート研究, 日本臨床栄養代謝学会学術集会, 2019

重症患者における急性期の蛋白投与量が早期離床・リハビリテーションの効果に与える影響, 集中治療医学会, 2019

\* 13

Tamura T, Yatabe T, Yokoyama M, Nishimura M. Current status of studies about optimal composition of amino acid and protein for ICU patients: systematic review. *Anaesth Intensive Care*. 2014;42(6):806-807.

\* 14

当院 PICU 入室患者の運動機能回復に与える因子の検討, 第 49 回日本集中治療医学会学術集会, 2022

当院 PICU における早期離床プロトコル導入の効果について－離床への効果について着目して－, 第 8 回小児理学療法学会, 2021

当院 PICU での離床と運動機能回復との関係, 第 47 回日本集中治療医学会学術集会, 2020

#### C-4

\* 15

集中治療室に入室した重症患者とその家族の集中治療後症候群の疫学調査, 2022

\* 16

Spronk PE, Sponk LEJ, Egerod I, et al. Dysphagia in Intensive Care Evaluation (DICE): An International Cross-Sectional Survey. *Dysphagia*. 2022;37(6):1451-1460.

\* 17

携帯型エコーを用いた嚥下評価の可視化調査, 2022

携帯型超音波機器によるベッドサイド嚥下評価の検者間信頼性の検証, 2020

48 時間以上の経口挿管下人工呼吸管理患者における抜管後嚥下障害の調査, 2019

\* 18

Nakanishi N, Matsushima S, Tatsuno J, et al. Impact of Energy and Protein Delivery to Critically Ill Patients: A Systematic Review and Meta-Analysis of Randomized Controlled Trials. *Nutrients*. 2022;14(22):4849.
